# Supplementary material for: Human Milk Oligosaccharide Supplementation Affects Intestinal Barrier Function and Microbial Composition in the Gastrointestinal Tract of Young Sprague Dawley Rats
Source: PubMed Central journal article supplement (PMC7284880; doi:10.3390/nu12051532), 2020-05-25
Supplement: nutrients-12-01532-s001.pdf [file nutrients-12-01532-s001.pdf]

## Supplementary Material

**Table S1:** Experimental diet composition from weeks 3-9 and 10-11

|                                 | Control   | 3'SL  | 2'FL  | 2'SL+2FL | Control     | 3'SL  | 2'FL  | 2'SL+2FL |
|---------------------------------|-----------|-------|-------|----------|-------------|-------|-------|----------|
| g/kg                            | Weeks 3-9 |       |       |          | Weeks 10-11 |       |       |          |
| <b>Cornstarch</b>               | 397.5     | 397.5 | 397.5 | 397.5    | 465.7       | 465.7 | 465.7 | 465.7    |
| <b>Casein</b>                   | 200       | 200   | 200   | 200      | 140         | 140   | 140   | 140      |
| <b>Dyetrose</b>                 | 132       | 132   | 132   | 132      | 155         | 155   | 155   | 155      |
| <b>Sucrose</b>                  | 100       | 100   | 100   | 100      | 100         | 100   | 100   | 100      |
| <b>Soybean Oil</b>              | 70        | 70    | 70    | 70       | 40          | 40    | 40    | 40       |
| <b>Alphacel</b>                 | 50        | 50    | 50    | 50       | 50          | 50    | 50    | 50       |
| <b>AIN-93M Mineral Mix</b>      | 35        | 35    | 35    | 35       | 35          | 35    | 35    | 35       |
| <b>AIN-93 VX Vitamin Mix</b>    | 10        | 10    | 10    | 10       | 10          | 10    | 10    | 10       |
| <b>L-cystine</b>                | 3         | 3     | 3     | 3        | 1.8         | 1.8   | 1.8   | 1.8      |
| <b>Choline-Bitartrate</b>       | 2.5       | 2.5   | 2.5   | 2.5      | 2.5         | 2.5   | 2.5   | 2.5      |
| <b>3'Sialyllactose</b>          | -         | 6.25  | -     | 6.25     | -           | 6.25  | -     | 6.25     |
| <b>2'Fucosyllactose</b>         | -         | -     | 6.25  | 6.25     | -           | -     | 6.25  | 6.25     |
| <b>Energy density (kJ/g)</b>    | 15.73     | 15.69 | 15.69 | 15.64    | 15.07       | 15.04 | 15.04 | 14.99    |
| <b>Carbohydrate (% of kcal)</b> | 63.9      | 64.0  | 64.0  | 64.1     | 75.9        | 76.0  | 76.0  | 76.1     |
| <b>Protein (% of kcal)</b>      | 19.4      | 19.3  | 19.3  | 19.2     | 14.1        | 14.1  | 14.1  | 14.0     |
| <b>Fat (% of kcal)</b>          | 16.8      | 16.7  | 16.7  | 16.6     | 10.0        | 10.0  | 10.0  | 9.9      |

All diets were mixed in house using ingredients from Dyets Inc. (Bethlehem, PA, USA) and HMOs from Glycom A/S (Hørsholm, Denmark). Diet composition from weeks 3-9 is based on the AIN-93G formulation to support growth while the diet from weeks 10-11 is based on AIN-93M for adult maintenance. The purity of 2'FL is 96.1% (w/w%) and of 3'SL is 97.5% (w/w%).

**Table S2:** Gut microbial group specific primers for qPCR

| <b>Microbial Group</b>                      | <b>Primers (5' → 3')</b> |                             |
|---------------------------------------------|--------------------------|-----------------------------|
| <b>Firmicutes:</b>                          |                          |                             |
| <i>Clostridium difficile</i> (cluster I)    | Forward                  | ATGCAAGTCGAGCGAKG           |
|                                             | Reverse                  | TATGCGGTATTAATCTYCCTT       |
| <i>Clostridium leptum</i> (cluster IV)      | Forward                  | GCACAAGCAGTGGAGT            |
|                                             | Reverse                  | CTCCTCCGTTTGTCAA            |
| <i>Clostridium perfringens</i> (cluster XI) | Forward                  | ACGCTACTTGAGGAGGA           |
|                                             | Reverse                  | GAGCCGTAGCCTTCTACT          |
| <i>Clostridium coccooides</i> (cluster XIV) | Forward                  | ACTCCTACGGGAGGCAGC          |
|                                             | Reverse                  | GCTTCTTAGTCARGTACCG         |
| <i>Faecalibacterium prausnitzii</i>         | Forward                  | AACCTTACCAAGTCTTGACATC      |
|                                             | Reverse                  | TTGCGTAGTAACTGACCATAAG      |
| <i>Lactobacillus</i> spp.                   | Forward                  | GAGGCAGCAGTAGGGAATCTTC      |
|                                             | Reverse                  | GGCCAGTTACTACCTCTATCCTTCTTC |
| <i>Roseburia</i> spp.                       | Forward                  | TACTGCATTGGAAACTGTCTG       |
|                                             | Reverse                  | CGGCACCGAAGAGCAAT           |
| <b>Bacteroidetes:</b>                       |                          |                             |
| <i>Bacteroides/Prevotella</i>               | Forward                  | TCCTACGGGAGGCAGCAGT         |
|                                             | Reverse                  | CAATCGGAGTTCTTCGTG          |
| <b>Actinobacteria:</b>                      |                          |                             |
| <i>Bifidobacterium</i> spp.                 | Forward                  | CGCGTCYGGTGTGAAAG           |
|                                             | Reverse                  | CCCCACATCCAGCATCCA          |
| <i>Collinsella aerofaciens</i>              | Forward                  | CCCGACGGGAGGGGAT            |
|                                             | Reverse                  | CTTCTGCAGGTACAGTCTTGAC      |
| <b>Archaea:</b>                             |                          |                             |
| <i>Methanobrevibacter</i>                   | Forward                  | CTCACCGTCAGAATCGTTCCAGTC    |
|                                             | Reverse                  | ACTTGAGATCGGGAGAGGTTAGAGG   |
| <b>Proteobacteria:</b>                      |                          |                             |
| <i>Enterobacteriaceae</i>                   | Forward                  | CATTGACGTTACCCGCAGAAGC      |
|                                             | Reverse                  | CTCTACGAGACTCAAGCTTGC       |
| <b>Verrucomicrobia:</b>                     |                          |                             |
| <i>Akkermansia muciniphila</i>              | Forward                  | TCTTCGGAGGCGTTACACAG        |
|                                             | Reverse                  | AGTTGATCTGGGCAGTCTCG        |

**Table S3:** Primer sequences for RT-PCR

| <b>Gene</b>           | <b>Primers (5'→3')</b> |                         |
|-----------------------|------------------------|-------------------------|
| <b>Proximal Colon</b> |                        |                         |
| MMP2                  | Forward                | CCTGAATACTTTCTATGGCTGC  |
|                       | Reverse                | GTATGTAGTGGAGCACCAGAGC  |
| MMP9                  | Forward                | GCAACGGAGACGGCAAACC     |
|                       | Reverse                | GACGAAGGGGAAGACGCA      |
| MUC2                  | Forward                | CCACCATTACCACCACCTCAG   |
|                       | Reverse                | CGATCACCACCATTGCCATTG   |
| GPR41                 | Forward                | TCCTCAGCACCTCAACTCT     |
|                       | Reverse                | CTAGCTCGGACACTCCTTGG    |
| GPR43                 | Forward                | CCGTGCAGTACAAGCTCTCC    |
|                       | Reverse                | CTGCTCAGTCGTGTTCAAGTATT |
| β-Actin               | Forward                | TATCGGCAATGAGCGGTTCC    |
|                       | Reverse                | AGCACTGTGTTGGLATAGAGG   |
| <b>Jejunum</b>        |                        |                         |
| ZO-1                  | Forward                | GAGTTTCGGGTCCGAGGAG     |
|                       | Reverse                | CATTGCTGTGCTCTTAGCGG    |
| Occludin              | Forward                | GAGGACTGGCTCAGGGAATATC  |
|                       | Reverse                | TTGTTGACCTCGTCGAGTTCTG  |

**Table S4:** Male and female body composition

|                                                | Control     | 3'SL        | 2'FL        | 3'SL+2'FL   | p-value |
|------------------------------------------------|-------------|-------------|-------------|-------------|---------|
| <b>Males</b>                                   |             |             |             |             |         |
| <b>Total Weight (g)</b>                        | 464.2± 11.2 | 426.2±11.5  | 439.1± 10.1 | 442.6±11.5  | 0.14    |
| <b>Lean+ BMC (g)</b>                           | 386.9±7.4   | 366.0±11.8  | 372.6±8.9   | 375.9±9.5   | 0.48    |
| <b>Fat Mass (g)</b>                            | 77.3±5.0    | 63.7±2.9    | 66.5±3.8    | 66.7±3.9    | 0.11    |
| <b>% Body Fat</b>                              | 16.5±0.8    | 15.9±0.8    | 15.1±0.7    | 15.0±0.7    | 0.46    |
| <b>Bone Mineral Content (g)</b>                | 11.0±0.3    | 10.0±0.3    | 10.2±0.2    | 10.5±0.3    | 0.07    |
| <b>Bone Mineral Density (g/cm<sup>2</sup>)</b> | 0.145±0.002 | 0.141±0.002 | 0.143±0.001 | 0.143±0.002 | 0.18    |
| <b>Females</b>                                 |             |             |             |             |         |
| <b>Total Weight (g)</b>                        | 256.0±4.8   | 264.1±10.1  | 269.7±8.8   | 269.9±8.1   | 0.59    |
| <b>Lean+ BMC (g)</b>                           | 224.8±5.0   | 226.9±9.4   | 235.4±5.7   | 235.2±6.5   | 0.60    |
| <b>Fat Mass (g)</b>                            | 31.2±2.7    | 37.3±4.0    | 34.8±3.2    | 33.8±3.7    | 0.65    |
| <b>% Body Fat</b>                              | 11.5±0.9    | 14.1±1.4    | 12.3±0.9    | 12.8±1.0    | 0.43    |
| <b>Bone Mineral Content (g)</b>                | 7.2±0.2     | 7.7±0.3     | 7.9±0.2     | 7.9±0.3     | 0.17    |
| <b>Bone Mineral Density (g/cm<sup>2</sup>)</b> | 0.138±0.002 | 0.139±0.001 | 0.141±0.001 | 0.143±0.001 | 0.09    |

Values are means ± SEM,  $n = 8-10$ . In the overall model, there was a significant sex effect ( $p=0.0001$  for Lean+BMC, Fat Mass, % Body Fat and BMC;  $p=0.02$  for BMD) therefore males and females were analyzed separately. Control: AIN-93; 3'SL: AIN-93 + 3'Sialyllactose; 2'FL: AIN-93 + 2'Fucosyllactose; 3'SL + 2'FL: AIN-93 + 3'Sialyllactose + 2'Fucosyllactose. Significance was set at  $p<0.05$ .

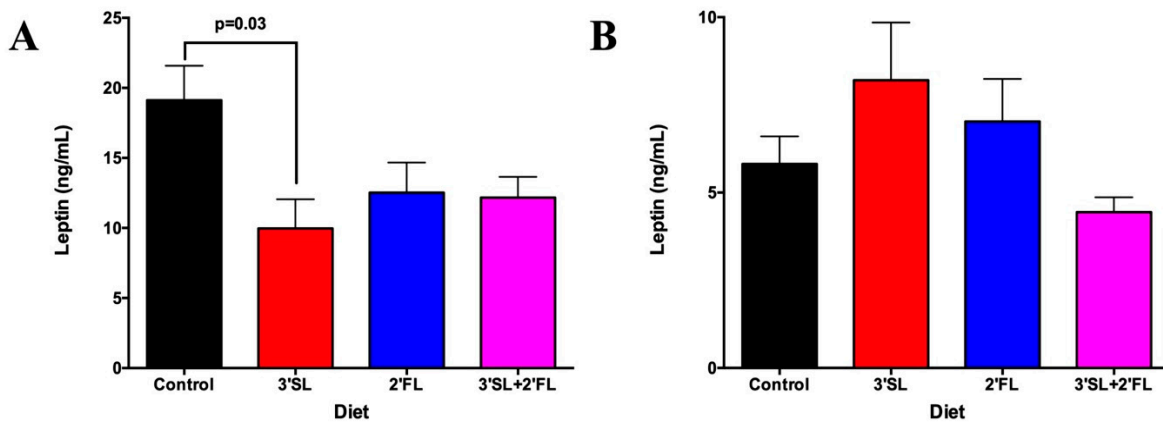

**Figure S1: Serum fasting leptin levels** at 11 weeks of age in (A) male and (B) female rats fed AIN-93 diet fortified with 3'SL, 2'FL, both or neither for 8 weeks. Values are means  $\pm$  SEM,  $n = 8-10$ . In the overall model, there was a significant sex effect ( $p=0.0001$ ), therefore males and females were analyzed separately. Control: AIN-93; 3'SL: AIN-93 + 3'Sialyllactose; 2'FL: AIN-93 + 2'Fucosyllactose; 3'SL + 2'FL: AIN-93 + 3'Sialyllactose + 2'Fucosyllactose.

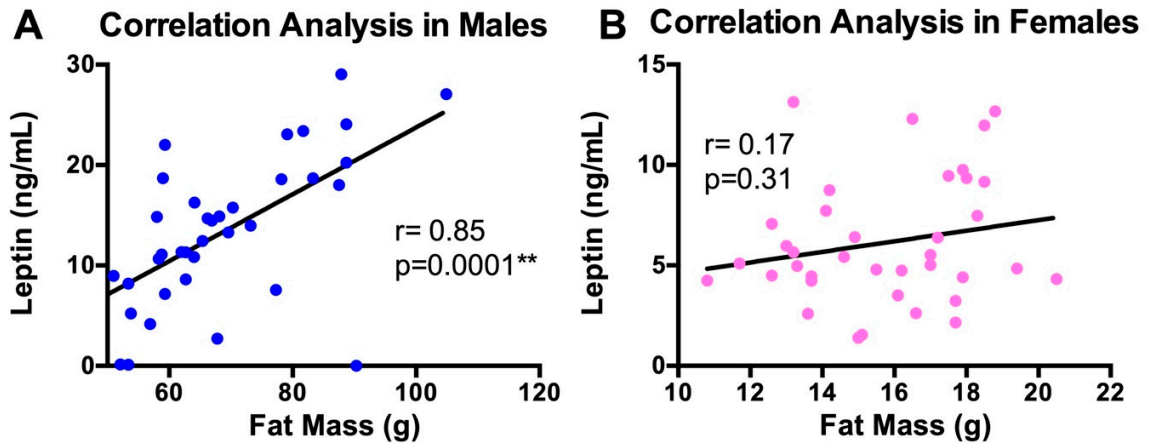

**Figure S2: Correlation between fat mass and leptin** using a Pearson correlation analysis at 11 weeks of age in (A) male and (B) female rats fed AIN-93 diet fortified with 3'SL, 2'FL, both or neither for 8 weeks.  $n = 38$  males,  $n = 38$  females.

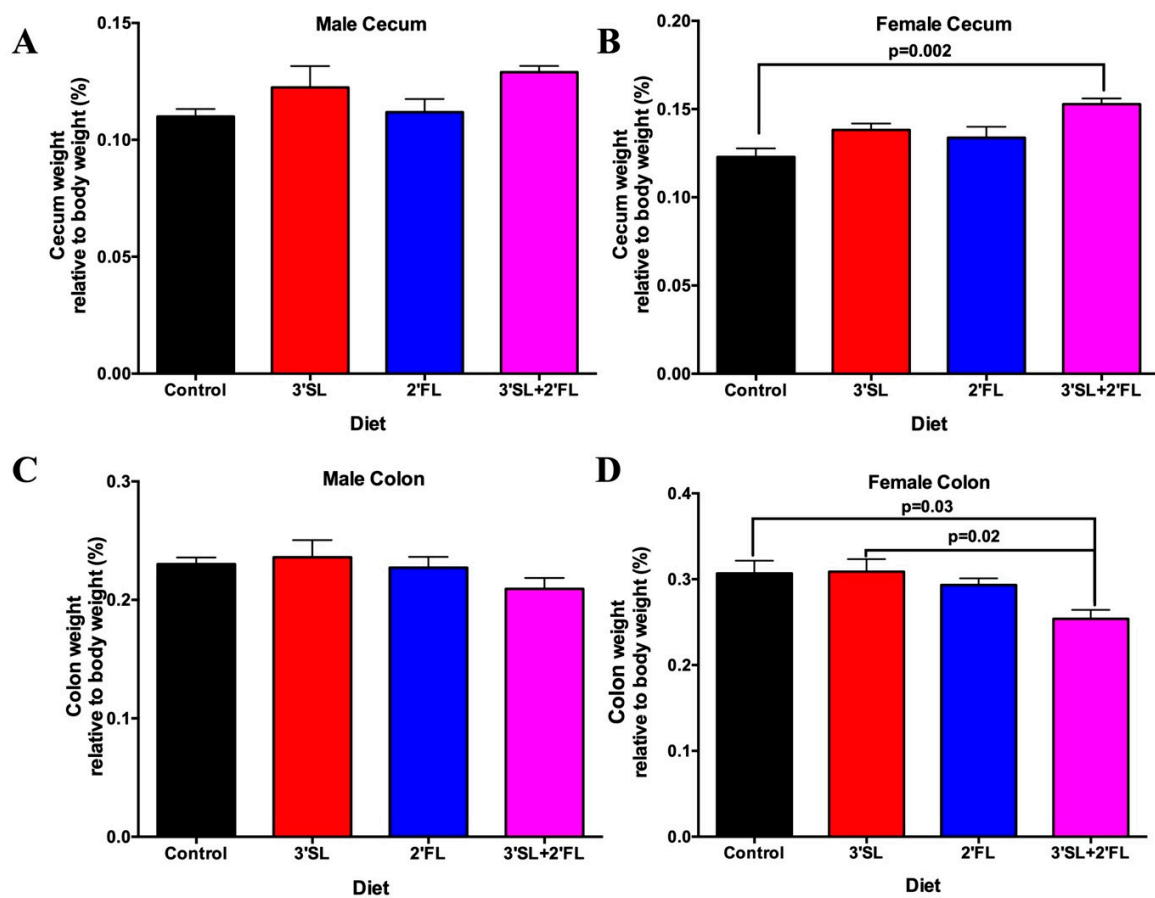

**Figure S3: Cecum and colon weight relative to body weight** respectively in (A, C) male and (B, D) female rats fed AIN-93 diet fortified with 3'SL, 2'FL, both or neither for 8 weeks. Values are means  $\pm$  SEM,  $n = 8-10$ . In the overall model, there was a significant sex effect for cecum and colon ( $p=0.0001$ ), therefore males and females were analyzed separately. Control: AIN-93; 3'SL: AIN-93 + 3'Sialyllactose; 2'FL: AIN-93 + 2'Fucosyllactose; 3'SL + 2'FL: AIN-93 + 3'Sialyllactose + 2'Fucosyllactose.

**Table S5:** Male and female serum inflammatory cytokines at 11 weeks of age in rats fed AIN-93 diet fortified diet with 3'SL, 2'FL, both or neither for 8 weeks.

|                                | Control                       | 3'SL                           | 2'FL                          | 3'SL+2'FL                     | p-value |
|--------------------------------|-------------------------------|--------------------------------|-------------------------------|-------------------------------|---------|
| <b>Males</b>                   |                               |                                |                               |                               |         |
| <b>TNF <math>\alpha</math></b> | 15.4 $\pm$ 2.7                | 13.0 $\pm$ 2.2                 | 8.1 $\pm$ 1.2                 | 10.4 $\pm$ 0.9                | 0.06    |
| <b>IL-1<math>\alpha</math></b> | 43.1 $\pm$ 11.5               | 32.4 $\pm$ 7.2                 | 38.4 $\pm$ 7.9                | 41.1 $\pm$ 7.8                | 0.86    |
| <b>IL-1<math>\beta</math></b>  | 44.5 $\pm$ 5.7                | 53.5 $\pm$ 9.0                 | 36.4 $\pm$ 5.4                | 59.8 $\pm$ 11.1               | 0.22    |
| <b>IL-5</b>                    | 113.9 $\pm$ 2.2               | 90.5 $\pm$ 11.1                | 90.4 $\pm$ 8.3                | 85.4 $\pm$ 4.9                | 0.08    |
| <b>IL-10</b>                   | 83.3 $\pm$ 16.0               | 64.9 $\pm$ 12.6                | 81.6 $\pm$ 16.6               | 107.7 $\pm$ 23.0              | 0.42    |
| <b>IL-18</b>                   | 539.6 $\pm$ 81.8 <sup>a</sup> | 428.1 $\pm$ 62.9 <sup>ab</sup> | 258.0 $\pm$ 29.8 <sup>b</sup> | 263.6 $\pm$ 20.3 <sup>b</sup> | 0.001   |
| <b>Females</b>                 |                               |                                |                               |                               |         |
| <b>TNF <math>\alpha</math></b> | 10.8 $\pm$ 1.7                | 6.0 $\pm$ 1.6                  | 8.5 $\pm$ 1.6                 | 8.7 $\pm$ 1.3                 | 0.23    |
| <b>IL-1<math>\alpha</math></b> | 34.4 $\pm$ 4.7                | 33.8 $\pm$ 4.7                 | 41.2 $\pm$ 10.6               | 39.1 $\pm$ 7.7                | 0.87    |
| <b>IL-1<math>\beta</math></b>  | 48.9 $\pm$ 10.1               | 36.8 $\pm$ 5.8                 | 57.4 $\pm$ 10.6               | 40.3 $\pm$ 5.2                | 0.31    |
| <b>IL-5</b>                    | 87.4 $\pm$ 6.9                | 85.3 $\pm$ 5.1                 | 83.55 $\pm$ 8.0               | 81.5 $\pm$ 8.5                | 0.95    |
| <b>IL-10</b>                   | 48.5 $\pm$ 8.8                | 52.8 $\pm$ 8.0                 | 84.9 $\pm$ 19.0               | 40.3 $\pm$ 7.7                | 0.07    |
| <b>IL-18</b>                   | 220.8 $\pm$ 21.4              | 239.3 $\pm$ 19.4               | 230.4 $\pm$ 26.4              | 202.1 $\pm$ 22.3              | 0.69    |

Values are means  $\pm$  SEM,  $n = 8-10$ . In the overall model, there was a significant sex effect for TNF $\alpha$  ( $p=0.01$ ), IL-5 ( $p=0.001$ ) and IL-18 ( $p=0.0001$ ) and a trend for IL-1 $\beta$  ( $p=0.06$ ) and IL-10 ( $p=0.07$ ), therefore males and females were analyzed separately. Within males and females, the superscripts<sup>a,b</sup> are used to depict differences between groups where groups without a common superscript differ ( $P<0.05$ ). Control: AIN-93; 3'SL: AIN-93 + 3'Sialyllactose; 2'FL: AIN-93 + 2'Fucosyllactose; 3'SL+2'FL: AIN-93 + 3'Sialyllactose + 2'Fucosyllactose. All units are pg/mL.



**Table S6** Correlation analysis in males between a panel of inflammatory cytokines and genes that maintain intestinal barrier function

|                                | <b>MMP2</b> | <b>MMP9</b> | <b>MUC2</b> | <b>GPR41</b>  | <b>GPR43</b> | <b>ZO-1</b>    | <b>Occludin</b> |
|--------------------------------|-------------|-------------|-------------|---------------|--------------|----------------|-----------------|
| <b>TNF<math>\alpha</math></b>  | -0.025      | -0.058      | 0.011       | 0.248         | 0.031        | 0.349          | 0.219           |
| <b>IL-1<math>\alpha</math></b> | -0.271      | 0.214       | -0.060      | 0.234         | 0.038        | -0.177         | -0.192          |
| <b>IL-1<math>\beta</math></b>  | -0.054      | -0.066      | 0.020       | 0.057         | -0.130       | -0.188         | -0.014          |
| <b>IL-5</b>                    | 0.148       | 0.244       | -0.160      | 0.188         | -0.263       | 0.183          | 0.256           |
| <b>IL-10</b>                   | -0.291      | 0.038       | -0.200      | <b>0.368*</b> | -0.289       | -0.020         | 0.082           |
| <b>IL-18</b>                   | 0.256       | -0.036      | -0.203      | 0.220         | -0.190       | <b>0.520**</b> | <b>0.499**</b>  |

MMP2, Matrix Metalloproteinase 2; MMP9, Matrix Metalloproteinase 9; MUC2, Mucin 2; GPR41, G Protein-Coupled Receptor 41; GPR43, G Protein-Coupled Receptor 43; ZO-1, Zonula occludens. \*p<0.05, \*\*p<0.01.

**Table S7** Correlation analysis in females between a panel of inflammatory cytokines and mRNA expression of genes that maintain intestinal barrier function

|                                | <b>MMP2</b> | <b>MMP9</b> | <b>MUC2</b>   | <b>GPR41</b> | <b>GPR43</b> | <b>ZO-1</b> | <b>Occludin</b> |
|--------------------------------|-------------|-------------|---------------|--------------|--------------|-------------|-----------------|
| <b>TNF<math>\alpha</math></b>  | -0.103      | -0.018      | -0.092        | -0.183       | -0.033       | 0.252       | 0.296           |
| <b>IL-1<math>\alpha</math></b> | -0.114      | 0.003       | -0.177        | 0.064        | -0.103       | -0.002      | 0.186           |
| <b>IL-1<math>\beta</math></b>  | 0.172       | -0.163      | -0.003        | 0.137        | 0.056        | -0.197      | 0.096           |
| <b>IL-5</b>                    | 0.118       | 0.025       | 0.227         | 0.137        | 0.070        | 0.028       | 0.271           |
| <b>IL-10</b>                   | 0.151       | -0.125      | 0.048         | 0.178        | 0.141        | -0.183      | 0.114           |
| <b>IL-18</b>                   | 0.123       | -0.092      | <b>0.358*</b> | 0.249        | 0.039        | 0.014       | 0.055           |

MMP2, Matrix Metalloproteinase 2; MMP9, Matrix Metalloproteinase 9; MUC2, Mucin 2; GPR41, G Protein-Coupled Receptor 41; GPR43, G Protein-Coupled Receptor 43; ZO-1, Zonula occludens. \*p<0.05, \*\*p<0.01.

**Table S8:** Relative abundance of fecal microbiota (qPCR) in male rats at 11 weeks of age fed AIN-93 diet fortified with 3'SL, 2'SL, both or neither

|                                              | Control                   | 3'SL                    | 2'FL                      | 3'SL+2'FL                 | p-value |
|----------------------------------------------|---------------------------|-------------------------|---------------------------|---------------------------|---------|
|                                              | Relative abundance (%)    |                         |                           |                           |         |
| <i>Bacteroides/Prevotella</i> spp.           | 2.4±0.7                   | 2.6±0.6                 | 2.4±0.4                   | 3.0±0.5                   | 0.88    |
| <i>Bifidobacterium</i> spp.                  | 0.5±0.1                   | 0.2±0.05                | 0.3±0.07                  | 0.4±0.1                   | 0.19    |
| <i>Enterobacteriaceae</i>                    | 0.4±0.1 <sup>a</sup>      | 0.2±0.05 <sup>ab</sup>  | 0.1±0.04 <sup>b</sup>     | 0.2±0.04 <sup>ab</sup>    | 0.02    |
| <i>Lactobacillus</i> spp.                    | 44.9±7.5                  | 57.9±12.5               | 33.3±11.0                 | 46.9±10.0                 | 0.48    |
| <i>Clostridium perfringens</i> (cluster I)   | 1.4±0.3                   | 0.7±0.2                 | 1.0±0.2                   | 0.7±0.1                   | 0.11    |
| <i>Clostridium leptum</i> (cluster IV)       | 14.3±2.2                  | 6.9±1.4                 | 12.0±3.2                  | 8.5±1.9                   | 0.12    |
| <i>Clostridium difficile</i> (cluster XI)    | 0.34±0.07                 | 0.4±0.06                | 0.2±0.01                  | 0.2±0.03                  | 0.06    |
| <i>Clostridium coccooides</i> (cluster XIV)  | 31.1±5.5                  | 23.3±4.2                | 24.3±4.4                  | 22.3±2.9                  | 0.48    |
| <i>Roseburia</i> spp.                        | 0.002±0.0002 <sup>a</sup> | 0.01±0.005 <sup>b</sup> | 0.002±0.0003 <sup>a</sup> | 0.002±0.0004 <sup>a</sup> | 0.01    |
| <i>Methanobrevibacter</i> spp.               | 0.01±0.002                | 0.02±0.003              | 0.02±0.003                | 0.02±0.002                | 0.53    |
| <i>Akkermansia muciniphila</i>               | 0.2±0.07                  | 0.04±0.03               | 0.08±0.03                 | 0.01±0.006                | 0.14    |
| <i>Faecalibacterium prausnitzii</i>          | 0.1±0.03                  | 0.07±0.02               | 0.07±0.01                 | 0.1±0.03                  | 0.08    |
| <i>Collinsella aerofaciens</i>               | 0.02±0.002                | 0.01±0.002              | 0.01±0.003                | 0.02±0.004                | 0.12    |
| <b>Total bacteria (16S rRNA gene copies)</b> | 39,654,166±6,540,301      | 41,778,495±5,162,862    | 42,574,434±6,551,598      | 44,569,545±2,780,744      | 0.93    |

Values are means ± SEM,  $n = 8-10$ . *Methanobrevibacter* spp., *Akkermansia muciniphila*, *Faecalibacterium prausnitzii* and *Collinsella aerofaciens* were log transformed. Total bacteria are represented as 16S rRNA gene copies/20 ng genomic DNA. All other taxa are presented as relative abundance (%) of bacterial taxa per total bacteria (16S rRNA gene copies / total 16S rRNA gene copies). 3'SL: AIN-93 + 3'Sialyllactose; 2'FL: AIN-93 + 2'Fucosyllactose; 3'SL+2'FL: AIN-93+ 3'Sialyllactose + 2'Fucosyllactose. The superscripts<sup>a, b</sup> are used to depict differences between groups where groups without a common superscript differ ( $P < 0.05$ ).

**Table S9:** Relative abundance of fecal microbiota (qPCR) in female rats at 11 weeks of age fed AIN diet fortified with 3'SL, 2'SL, both or neither

| Treatment                                    | Control                            | 3'SL                             | 2'FL                              | 3'SL+2'FL                         | p-value |
|----------------------------------------------|------------------------------------|----------------------------------|-----------------------------------|-----------------------------------|---------|
|                                              | Relative abundance (%)             |                                  |                                   |                                   |         |
| <i>Bacteroides/Prevotella</i> spp.           | 3.3±0.7                            | 3.0±0.4                          | 1.5±0.3                           | 2.4±0.5                           | 0.07    |
| <i>Bifidobacterium</i> spp.                  | 0.2±0.1                            | 0.1±0.01                         | 0.2±0.04                          | 0.2±0.04                          | 0.28    |
| Enterobacteriaceae                           | 0.3±0.1                            | 0.2±0.05                         | 0.3±0.1                           | 0.2±0.03                          | 0.42    |
| <i>Lactobacillus</i> spp.                    | 21.9±7.5                           | 34.8±14.6                        | 26.0±9.5                          | 24.4±10.1                         | 0.85    |
| <i>Clostridium perfringens</i> (cluster I)   | 1.2±0.2 <sup>ab</sup>              | 0.4±0.1 <sup>a</sup>             | 1.6±0.4 <sup>b</sup>              | 0.6±0.1 <sup>a</sup>              | 0.002   |
| <i>Clostridium leptum</i> (cluster IV)       | 14.4±1.8                           | 8.8±1.5                          | 8.5±1.8                           | 13.9±2.6                          | 0.19    |
| <i>Clostridium difficile</i> (cluster XI)    | 0.4±0.1                            | 0.3±0.04                         | 0.3±0.04                          | 0.3±0.04                          | 0.24    |
| <i>Clostridium coccooides</i> (cluster XIV)  | 30.7±3.1                           | 26.5±4.6                         | 24.5±5.6                          | 16.0±3.7                          | 0.15    |
| <i>Roseburia</i> spp.                        | 0.006±0.002                        | 0.002±0.0004                     | 0.002±0.0004                      | 0.002±0.0003                      | 0.07    |
| <i>Methanobrevibacter</i> spp.               | 0.02±0.003 <sup>ab</sup>           | 0.03±0.005 <sup>a</sup>          | 0.01±0.002 <sup>b</sup>           | 0.02±0.003 <sup>b</sup>           | 0.002   |
| <i>Akkermansia muciniphila</i>               | 0.2±0.07 <sup>a</sup>              | 0.02±0.007 <sup>ab</sup>         | 0.07±0.03 <sup>ab</sup>           | 0.007±0.003 <sup>b</sup>          | 0.009   |
| <i>Faecalibacterium prausnitzii</i>          | 0.1±0.03                           | 0.07±0.03                        | 0.1±0.01                          | 0.1±0.02                          | 0.46    |
| <i>Collinsella aerofaciens</i>               | 0.02±0.003                         | 0.02±0.003                       | 0.02±0.004                        | 0.02±0.003                        | 0.10    |
| <b>Total bacteria (16S rRNA gene copies)</b> | 32,776,158±2,447,995 <sup>ab</sup> | 23,426,482±903,946 <sup>ab</sup> | 39,659,548±6,931,952 <sup>a</sup> | 20,657,973±2,909,108 <sup>b</sup> | 0.02    |

Values are means ± SEM,  $n = 8-10$ . *Bacteroides* spp., *C. leptum*, *Roseburia* spp., *A. muciniphila* and *C. aerofaciens* were log transformed. Total bacteria are represented as 16S rRNA gene copies/20 ng genomic DNA. All other taxa are presented as relative abundance (%) of bacterial taxa per total bacteria (16S rRNA gene copies / total 16S rRNA gene copies). 3'SL: AIN-93 + 3'Sialyllactose; 2'FL: AIN-93 + 2'Fucosyllactose; 3'SL+2'FL: AIN-93 + 3'Sialyllactose + 2'Fucosyllactose. The superscripts<sup>a, b</sup> are used to depict differences between groups where groups without a common superscript differ ( $P < 0.05$ ).

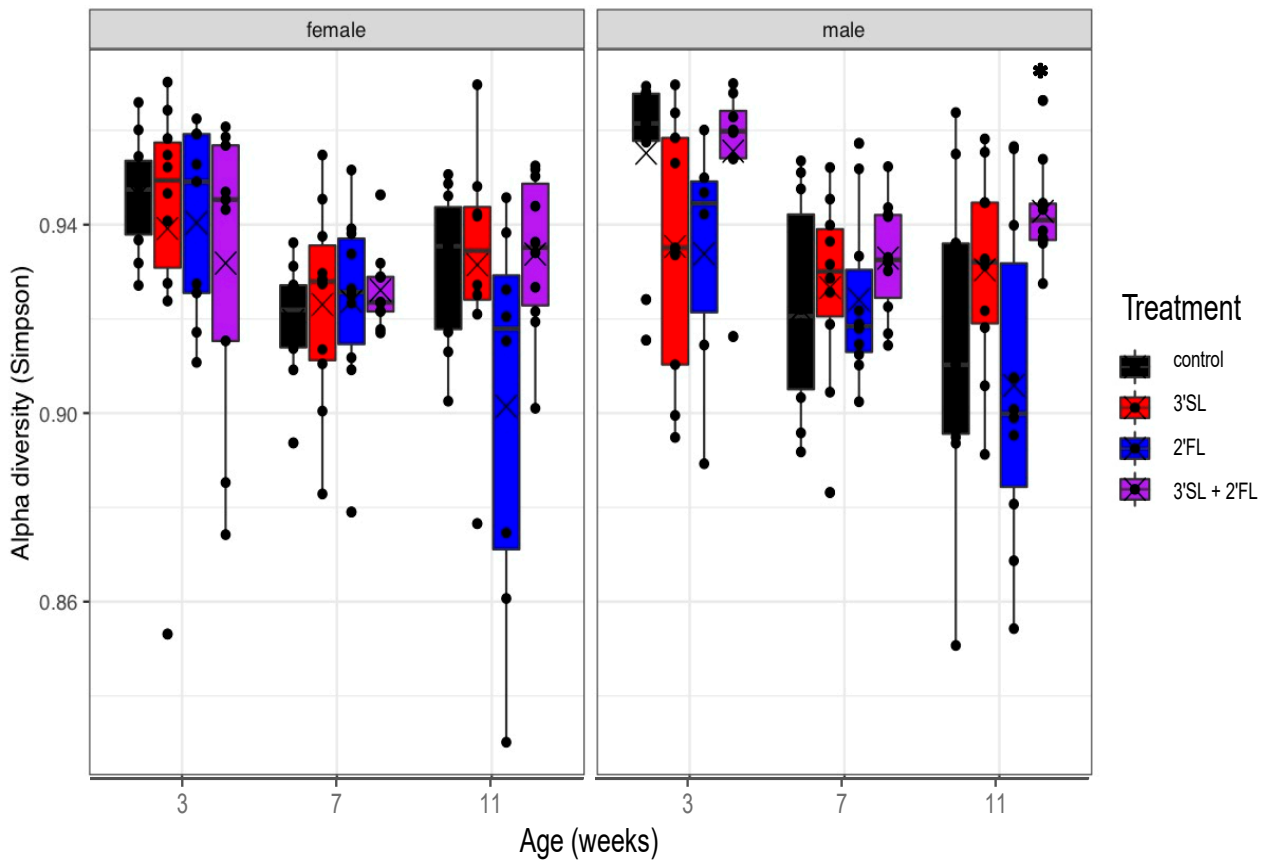

**Figure S4: Male and female alpha diversity according to the Simpson index using the phyloseq package at 3, 7 and 11 weeks of age. Control: AIN-93; 3'SL: AIN-93 + 3'Sialyllactose; 2'FL: AIN-93 + 2'Fucosyllactose; 3'SL + 2'FL: AIN-93 + 3'Sialyllactose + 2'Fucosyllactose. \*Significance was set at  $p < 0.05$ .**

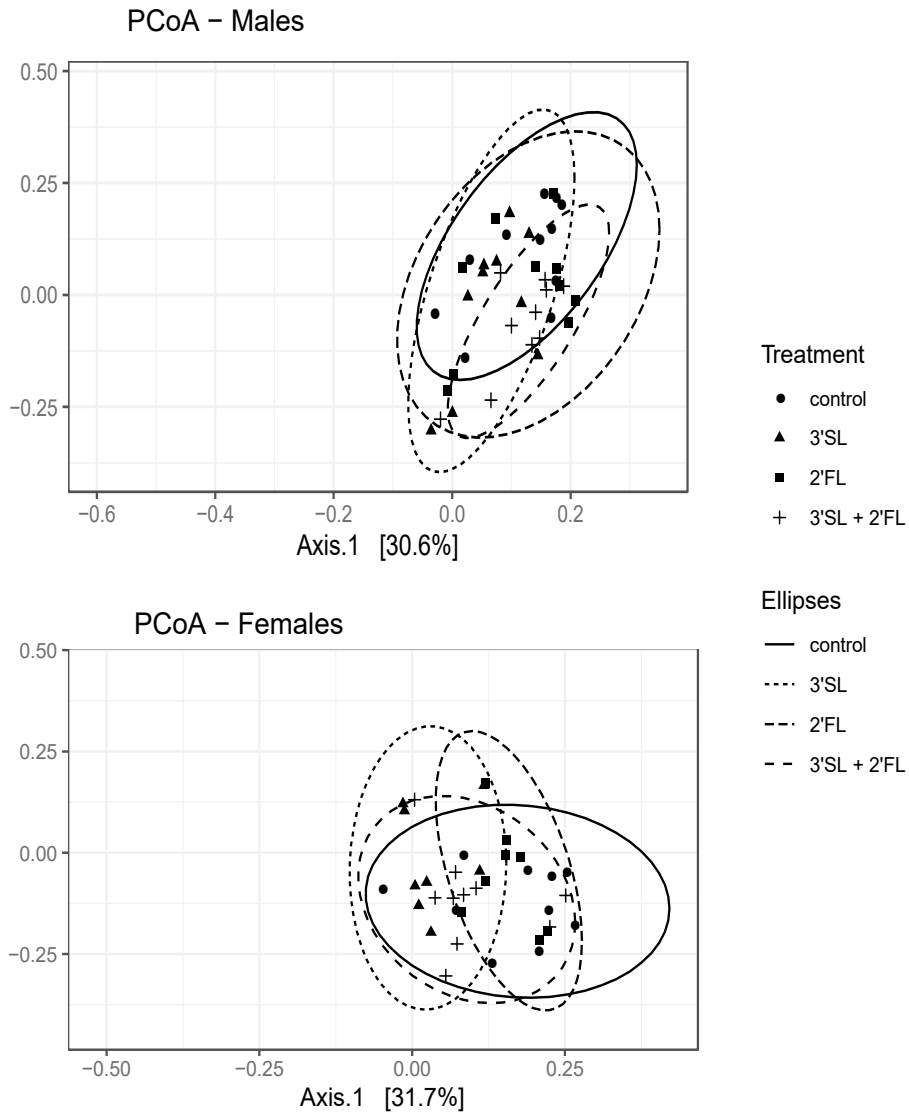

**Figure S5: Male and female beta diversity at 11 weeks of age** calculated with principle coordinates analysis (PCoA) using a Bray-Curtis distance matrix. ASVs are normalized proportionally, by relative abundance. ASVs present in less than 5% of the samples were removed. Control: AIN-93; 3'SL: AIN-93 + 3'Sialyllactose; 2'FL: AIN-93 + 2'Fucosyllactose; 3'SL + 2'FL: AIN-93 + 3'Sialyllactose + 2'Fucosyllactose.

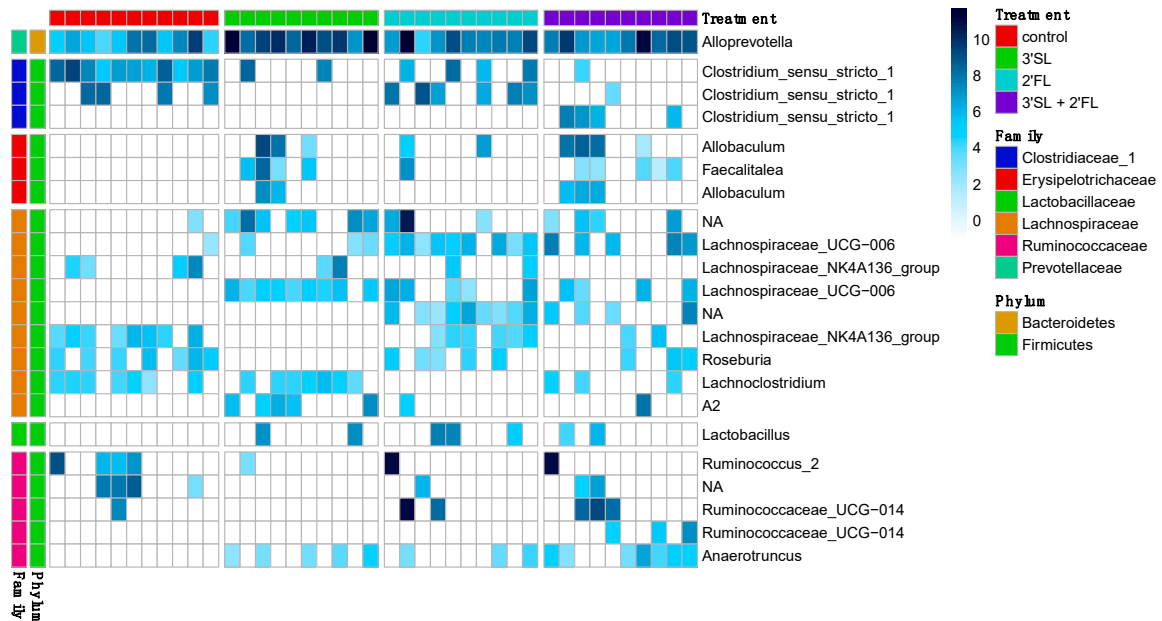

**Figure S6: Heatmap of top gut bacterial phyla, families and genera between treatments in males at 11 weeks of age.** Control: AIN-93; 3'SL: AIN-93 +3'Sialyllactose; 2'FL: AIN-93 + 2'Fucosyllactose; 3'SL + 2'FL: AIN-93 + 3'Sialyllactose + 2'Fucosyllactose.

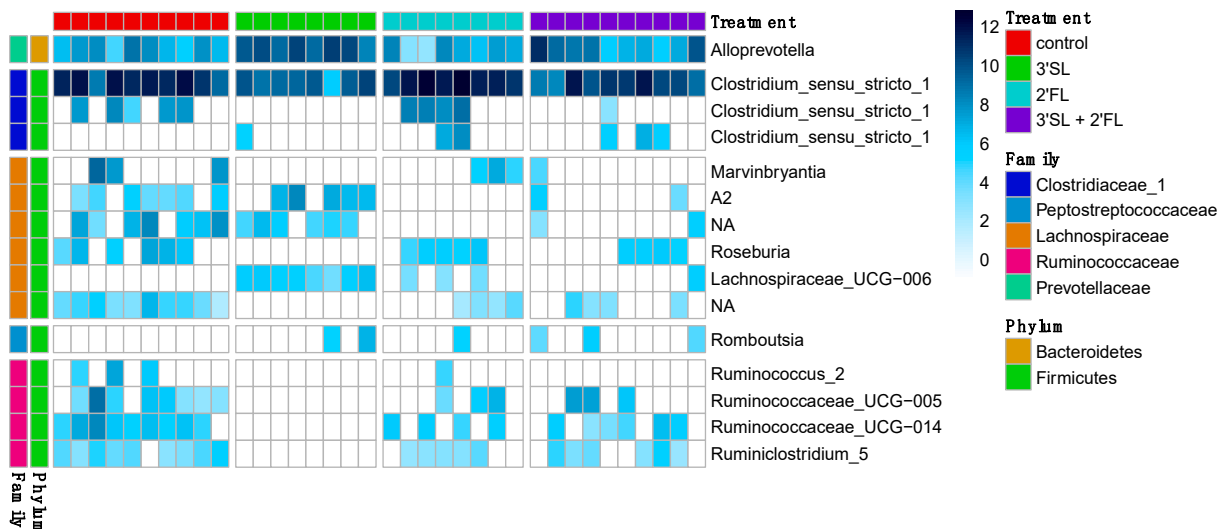

**Figure S7: Heatmap of top gut bacterial phyla, families and genera between treatments in females at 11 weeks of age.** Control: AIN-93; 3'SL: AIN-93 +3'Sialyllactose; 2'FL: AIN-93 + 2'Fucosyllactose; 3'SL + 2'FL: AIN-93 + 3'Sialyllactose + 2'Fucosyllactose.
